# **An endogenous lentivirus in the germline of a rodent.**

Roziah Kambol<sup>1</sup>, Anna Gatseva<sup>2</sup>, and Robert J. Gifford<sup>2</sup>

<sup>1</sup>*School of Biological Sciences, Faculty of Applied Sciences, University Teknologi MARA, Shah Alam, 40450 Selangor*

<sup>2</sup>*MRC-University of Glasgow Centre for Virus Research, 464 Bearsden Rd, Bearsden, Glasgow, UK, G61 1QH*

## **ABSTRACT**

Lentiviruses (genus *Lentivirus*) are complex retroviruses that infect a broad range of mammals, including humans. Unlike many other retrovirus genera, lentiviruses have only rarely been incorporated into the mammalian germline. However, a small number of endogenous retrovirus (ERV) lineages have been identified, and these rare genomic “fossils” can provide crucial insights into the long-term history of lentivirus evolution. Here, we describe a previously unreported endogenous lentivirus lineage in the genome of the South African springhare (*Pedetes capensis*), demonstrating that the host range of lentiviruses has historically extended to rodents (order Rodentia). Furthermore, through comparative and phylogenetic analysis of lentivirus and ERV genomes, considering the biogeographic and ecological characteristics of host species, we reveal broader insights into the long-term evolutionary history of the genus.

# 1 INTRODUCTION

2 The lentiviruses (genus *Lentivirus*) are an unusual group of retroviruses (family  
3 *Retroviridae*) that infect mammals and are associated with a range of slow, progressive  
4 diseases in their respective host species groups [1] (**Table 1**). They are most familiar as the  
5 genus of retroviruses that includes human immunodeficiency virus type 1 (HIV-1), but the  
6 group also includes viruses that infect a broad range of other mammalian groups.  
7 Lentiviruses are distinguished from other retroviruses by several characteristic features,  
8 including several unique accessory genes, a characteristic nucleotide composition [2, 3],  
9 and the capacity to infect non-dividing target cells [4].

10 All retroviruses replicate via an obligate step in which a DNA copy of the viral  
11 genome is integrated into a host cell chromosome [5]. The integrated viral genome is flanked  
12 at either side by identical long terminal repeat (LTR) sequences (a form referred to as a  
13 ‘provirus’), each composed of functionally distinct U3, R and U5 regions. Occasionally,  
14 germline cells may be infected and subsequently go on to form viable progeny, so that  
15 integrated retroviral proviruses are vertically inherited as host alleles [6]. Such endogenous  
16 retroviruses (ERV) insertions are relatively common features in vertebrate genomes [7, 8].  
17 Phylogenetic studies indicate that, following genome invasion, ERVs can increase their  
18 germline copy number through a variety of mechanisms, including active replication [9].  
19 However, reflecting their ancient origins, most ERV insertions are genetically fixed and  
20 highly degraded by germline mutation. Furthermore, deletion of the entire internal region  
21 occurs frequently via homologous recombination between proviral LTRs, leaving behind a  
22 single LTR sequence or ‘solo LTR’ [10]. Despite being highly degraded, however, ERVs  
23 provide a useful source of retrospective information about the long-term evolutionary  
24 interactions between retroviruses and their hosts [11]. For example, identification of  
25 orthologous ERV insertions in related species provides a robust means of deriving minimum  
26 age calibrations for retrovirus groups, based on host species divergence estimates (which  
27 are in part informed by the fossil record) [12]. More broadly, ERV sequences can be used to  
28 explore the long-term evolutionary history of ancient - presumably extinct - retrovirus groups

1 [13, 14], and to inform our understanding of their interactions with host genes [15]. ERV  
2 sequences can even be used to guide the reconstitution of ancient retrovirus proteins so that  
3 their biological properties may be empirically investigated *in vitro* [16-18].

4       Lentiviruses have only rarely been incorporated into the germline of host species.  
5 However, a handful of Lentivirus-derived ERV lineages have now been identified (**Table 1**),  
6 and these sequences demonstrate that viruses clearly recognisable as lentiviruses  
7 circulated in mammals many millions of years ago. For example, rabbit endogenous  
8 lentivirus K (RELK) insertions were found to occur at orthologous positions in the rabbit  
9 (*Oryctolagus cuniculus*) and hare (*Lepus europaeus*) genomes, demonstrating that genome  
10 invasion occurred prior to divergence of these species ~12 million years ago (Mya) [12, 19].  
11 Endogenous lentiviruses have also been identified in lemurs (family Lemnridae) [20, 21];  
12 mustelids (family Mustelidae) [22, 23]; and dermopterans (order Dermoptera - a group of  
13 arboreal gliding mammals native to Southeast Asia) [24-26]. Together, these sequences  
14 provide a range of minimum age calibrations in the Miocene epoch (23.5-5.3 Mya), based on  
15 host species divergence date estimates derived from the fossil record [11, 22, 25].  
16 Widespread circulation among mammals is further supported by estimates derived via  
17 application of a molecular clock, some of which extend into the Eocene epoch (56-33.9 Mya)  
18 [24, 26].

19       In this study we perform comprehensive screening of published mammalian  
20 genomes and identify a previously unreported endogenous lentivirus lineage in the genome  
21 of the South African springhare (*Pedetes capensis*), demonstrating that lentivirus host range  
22 extends to rodents. Furthermore, through comparative and phylogenetic analysis,  
23 incorporating all available data, we provide broader insight into the origins and long-term  
24 evolutionary history of lentiviruses.

25

## 26 **MATERIALS & METHODS**

### 27 Genome screening in silico

1 We used database-integrated genome screening (DIGS) [27] to derive a non-  
 2 redundant database of lentivirus-derived ERV loci contained in published genome sequence  
 3 assemblies. In DIGS, the output of systematic, sequence similarity search-based ‘screens’ is  
 4 captured in a relational database. The DIGS tool [27] is a Perl-based framework in which the  
 5 Basic Local Alignment Search Tool (BLAST) program suite (version 2.2.31+) [28] is used to  
 6 perform systematic similarity searches of sequence databases (e.g., genome assemblies)  
 7 and the MySQL relational database management system (MySQL Community Server  
 8 version 8.0.30) is used to record and organise output data. WGS data of 431 mammalian  
 9 species were obtained from the National Center for Biotechnology Information (NCBI)  
 10 genome database [29] (**Table S1**). Query polypeptide sequences were derived from  
 11 representative lentivirus species (**Table 1**). DNA sequences in WGS assemblies that  
 12 disclosed significant similarity to lentivirus queries (as determined by BLAST e-value) were  
 13 classified via comparison to published retrovirus genome sequences (again using BLAST).  
 14 Consensus genome sequences for endogenous lentivirus lineages were extracted from the  
 15 supplementary material of associated publications, as follows: RELIK [19]; PSIV1 [20];  
 16 PSIV2 [21]; MELV [22]; DELV [24].

17 We compiled a set of endogenous lentivirus loci (**Table S2**) by using structured query  
 18 language) to filter screening the classified, non-redundant results of >130,000 searches,  
 19 selecting matches based on their degree of similarity to lentivirus reference sequences, or  
 20 the taxonomic characteristics of the species in which they occur. Using this approach we  
 21 separated putatively novel lentivirus ERV loci from both (i) orthologs or paralogs of  
 22 previously characterised lentivirus ERVs, and (ii) non-lentiviral sequences that cross-  
 23 matched to lentivirus probes due to shared ancestry (e.g., clade II ERVs) [30, 31]. We  
 24 confirmed that putative novel lentivirus ERVs were indeed derived from lentiviruses (rather  
 25 than other, related retroviruses) through phylogenetic and genomic analysis as described  
 26 below.

27

28 Phylogenetic and genomic analysis

1 Nucleotide and protein phylogenies were reconstructed using maximum likelihood  
2 (ML) as implemented in RAxML (version 8.2.12) [32]. Protein substitution models were  
3 selected via hierarchical maximum likelihood ratio test using the PROTAUTOGAMMA option  
4 in RAxML. To estimate the ages of solo LTRs we measured divergence from an LTR  
5 consensus sequence and applied a neutral rate calibration, as described by Subramanian *et*  
6 *al.* [33]. We used Se-AL (version 2.0) to visualise alignments and create consensus  
7 sequences [34].

8

## 9 RESULTS & DISCUSSION

10 We systematically screened WGS data representing 431 mammalian species (**Table**  
11 **S1**) for endogenous lentivirus loci using similarity search-based approaches We identified a  
12 total of 842 distinct lentivirus-derived ERV loci, most of which represented members of  
13 previously described lentivirus ERV lineages (**Table 2**, [35]). However, we also identified  
14 lentivirus-derived sequences in the genome of a species group in which they have not  
15 previously been described – rodents (order Rodentia).

16 Matches to lentiviral Gag and Pol proteins were identified in WGS data of the South  
17 African springhare (*Pedetes capensis*), and phylogenetic analysis of the reverse  
18 transcriptase (RT) coding region encoded by these ERVs demonstrates that they group  
19 within the diversity of previously described lentivirus species (**Fig. S1a**). Initially, only four  
20 copies of Springhare endogenous lentivirus (SpELV) were identified in the *P. capensis*  
21 genome. However, we were able to identify the 5' LTR of a partial provirus sequence by  
22 using upstream flanking sequence as a query in BLASTn-based searches of the *P. capensis*  
23 genome assembly. This revealed the presence of a repetitive sequence showing the  
24 characteristic features of a retroviral LTR (i.e., ~500 nucleotides in length with terminal TG  
25 and CA dinucleotides) in the expected position upstream of the Gag ORF. Using this LTR  
26 sequence as input for screening enabled us to identify another 10 SpELV loci represented  
27 by solo LTR sequences (**Table 3**). We generated a consensus SpELV genome using all  
28 fourteen loci identified in our screen (**Fig. S2**). We did not identify an envelope (*env*) gene

1 associated with any SpELV insertions, nor did we identify any contigs containing complete  
 2 proviruses with paired LTR sequences. Furthermore, because the longest provirus  
 3 sequence we identified was truncated in *pol* we could not determine whether any accessory  
 4 genes might have been encoded downstream of this gene. Nonetheless, the partial genome  
 5 obtained in our analysis exhibits the characteristic features of lentivirus genomes, including  
 6 (i) a primer-binding site specific for tRNA Lysine (**Fig. S3**); (ii) a Pro-Pol ORF expressed via -  
 7 1 ribosomal frameshifting (**Fig. S3**); (iii) an adenine-rich (34%) genome (**Fig. S4**) containing  
 8 few CpG dinucleotides (0.29%); (iv) a putative *trans*-activator response (TAR) element (**Fig.**  
 9 **S2, Fig. S3**). We estimated the age of the SpELV lineage utilising a molecular clock-based  
 10 approach in which divergence is calculated by comparing individual LTR sequences to an  
 11 LTR consensus [33]. We obtained age estimates in the range of 8-18 Mya for SpELV loci  
 12 (**Table 3**), consistent with an origin in the Middle Miocene.

13 We used maximum likelihood-based phylogenetic approaches to reconstruct the  
 14 evolutionary relationships between contemporary lentiviruses and the extinct lentiviruses  
 15 represented by ERVs. Phylogenetic trees clearly separate the Lentiviruses into two robustly  
 16 supported subclades (**Fig. 1**). One (here labelled 'Archaeolentivirus') contains SpELV  
 17 together with dermopteran endogenous lentivirus (DELV) which occurs in the germline of  
 18 colugos [24-26]. A second (here labelled 'Neolentivirus') contains all other endogenous  
 19 lentivirus lineages and all known contemporary lentiviruses. We obtained relatively high  
 20 support for internal branching relationships within the Neolentivirus clade – reconstructions  
 21 support the existence of a distinct 'primate' group of neolentiviruses containing both simian  
 22 and prosimian sub-lineages, and an 'artiodactyl' group incorporating both the bovine  
 23 lentiviruses and the small ruminant lentiviruses. In addition, the primate lentiviruses group  
 24 separately from all other neolentiviruses, which together constitute a 'grasslands-associated'  
 25 clade comprised of lentiviruses that infect(ed) grassland-adapted host species.

26 To examine the distribution and diversity of lentiviruses in the context of host  
 27 evolution, we plotted information related to (i) lentivirus distribution and (ii) host  
 28 biogeographic range onto a time-calibrated phylogeny of boreoeutherian hosts (**Fig. 2**). This

revealed that age estimates obtained from the genomic fossil record (either through the identification of ancient orthologs, or via the application of a molecular clock) are consistent with other calibrations in deep time that can be tentatively inferred from ancestral biogeographic distributions by parsimoniously assuming limited transfer of virus between major biogeographic regions and distantly related host groups. Lentiviruses are known to cross species barriers quite frequently [36, 37], but transmission between large phylogenetic distances (e.g., distinct taxonomic orders of mammals) has never been reported and is unlikely to be common based on current understanding of the barriers to zoonotic transfer [38]. Evidence from orthology and molecular clock-based analyses supports the presence of DELV in Asia (the only region where colugos occur) up to 60 Mya – i.e., throughout most of the Cenozoic Era [26]. identification of a DELV-related virus in springhares – which evolved in the African subcontinent – implies the presence of archaeolentiviruses in ancestral mammals >80 Mya [39]. Notably, other groupings within the Neolentivirus subclade are also consistent with late Cretaceous origins predating the subordinal divergences of major placental mammal groups. For example, the existence of an ancient primate lineage, incorporating both lemurs, apes, and monkeys (**Fig. 1**) is consistent with a parsimonious scenario under which lentiviruses were present in the common ancestor of all primates and arrived in Madagascar with founder populations of ancestral lemurs ~60 Mya [40, 41].

At the same time, it seems clear that transmission of lentiviruses between phylogenetically distant mammal groups has occurred in the past. For example, the ‘grasslands-associated’ subclade contains viruses and paleoviruses that infect (or infected) phylogenetically distinct host species groups that share grassland habitat. It includes equine infectious anaemia virus (EIAV) which infects horses, and two ERV lineages - RELIK (found in leporids) and MELV (found in mustelids) [42-44]. Notably, the grassland adaptation of these three host species groups took place in a similar time-period (early-to-middle Miocene) in interconnected biogeographic areas (Laurasia and Africa) [42-44] (**Fig. 2**), suggesting that the connections between the viruses in this clade could reflect inter-order transmission events that took place in a shared habitat.

1

## 2 **CONCLUSIONS**

3       We describe a novel endogenous lineage in the genome of the South African  
4 springhare. The identification of SpELV demonstrates that lentivirus host range has  
5 historically extended to rodents. Through comparative and phylogenetic analysis of modern  
6 and ancient lentivirus genomes, we show that the *Lentivirus* genus incorporates at least two  
7 major subclades and reveal evidence it originated >80 Mya. In addition, we reveal  
8 phylogenetic evidence that transmission of lentiviruses between distantly related mammalian  
9 groups (i.e., distinct orders) has historically occurred in shared habitats.



**Table 1. Reference genome sequences of representative lentivirus species**

| Species                              | Host species               |                                  | Abbreviation / sub-strain | Source <sup>a</sup> |
|--------------------------------------|----------------------------|----------------------------------|---------------------------|---------------------|
| <b>Exogenous viruses</b>             |                            |                                  |                           |                     |
| Jembrana disease virus               | Gaur                       | <i>Bos gaurus</i>                | JDV                       | NC_001654           |
| Bovine immunodeficiency virus        | Domestic cattle            | <i>Bos taurus</i>                | BIV                       | M32690              |
| Small ruminant lentivirus genotype A | Goats & sheep              |                                  | SRLV-A                    | NC_001452           |
| Small ruminant lentivirus genotype B | Goats & sheep              |                                  | SRLV-B                    | NC_001463           |
| Equine infectious anemia virus       | Domestic horse             | <i>Equus caballus</i>            | EIAV                      | M16575              |
| Feline immunodeficiency virus        | Domestic cat               | <i>Felis catus</i>               | FIV-fca                   | M25381              |
|                                      | Pallas's cat               | <i>Otocolobus manul</i>          | FIV-oma                   | U56928              |
|                                      | Puma                       | <i>Puma concolor</i>             | FIV-pco                   | EF455613            |
| Simian immunodeficiency virus        | Spot-nosed monkeys         | <i>Cercopithecus nictitans</i>   | SIV-gsn                   | AF468659            |
|                                      | Colobus monkey             | <i>Colobus guereza</i>           | SIV-col                   | AF301156            |
|                                      | Sykes' monkey              | <i>Cercopithecus albogularis</i> | SIV-syk                   | L06042              |
|                                      | Dent's monkey              | <i>Cercopithecus denti</i>       | SIV-den                   | AJ580407            |
|                                      | Drill monkey               | <i>Mandrillus leucophaeus</i>    | SIV-drl                   | AY159321            |
|                                      | Green monkey               | <i>Chlorocebus sabaeus</i>       | SIV-agm-sab               | U04005              |
|                                      | Mangabey                   | <i>Cercocebus torquatus</i>      | SIV-rcm                   | HM803689            |
|                                      | Central chimpanzee         | <i>Pan troglodytes</i>           | SIV-cpz-ptt               | AF103818            |
|                                      | Sooty mangabey             | <i>Cercocebus atys atys</i>      | SIV-smm                   | X14307              |
|                                      | Sun-tailed monkey          | <i>Cercopithecus solatus</i>     | SIV-sun                   | AF131870            |
|                                      | Mandrill                   | <i>Mandrillus sphinx</i>         | SIV-mnd-1                 | M27470              |
| Human immunodeficiency virus 1*      | Human                      | <i>Homo sapiens</i>              | HIV-1                     | AF033819            |
| Human immunodeficiency virus 2       | Domestic cattle            | <i>Bos taurus</i>                | HIV-2A                    | X05291              |
| <b>Endogenous viruses</b>            |                            |                                  |                           |                     |
| Rabbit endogenous lentivirus K       | Leporids (rabbits & hares) |                                  | RELK                      | [19]                |
| Prosimian immunodeficiency virus 1   | Mouse lemurs               |                                  | PSIV1                     | [20]                |
| Prosimian immunodeficiency virus 2   | Dwarf lemurs               |                                  | PSIV2                     | [21]                |
| Mustelid endogenous lentivirus       | Mustelids (subclade)       |                                  | MELV                      | [22]                |
| Dermopteran endogenous lentivirus    | Colugos                    |                                  | DELV                      | [24]                |

**Footnote:** <sup>a</sup> GenBank accession numbers are given for exogenous viruses. For endogenous lentivirus lineages consensus genome sequences were extracted from the publication shown.

**Table 2. Endogenous lentivirus loci detected via screening.**

| Organism                       | Common name                 | ERV lineage | Count |
|--------------------------------|-----------------------------|-------------|-------|
| <i>Oryctolagus cuniculus</i>   | European rabbit             | RELIK       | 203   |
| <i>Lepus americanus</i>        | Snowshoe hare               | RELIK       | 212   |
| <i>Lepus timidus</i>           | European hare               | RELIK       | 121   |
| <i>Sylvilagus bachmani</i>     | Brush rabbit                | RELIK       | 159   |
| <i>Microcebus griseorufus</i>  | Reddish-grey mouse lemur    | PSIV1       | 20    |
| <i>Microcebus mittermeieri</i> | Mittermeier's mouse lemur   | PSIV1       | 20    |
| <i>Microcebus murinus</i>      | Grey mouse lemur            | PSIV1       | 11    |
| <i>Microcebus ravelobensis</i> | Golden-brown mouse lemur    | PSIV1       | 21    |
| <i>Microcebus tavaratra</i>    | Northern rufous mouse lemur | PSIV1       | 20    |
| <i>Cheirogaleus medius</i>     | Fat-tailed dwarf lemur      | PSIV2       | 1     |
| <i>Mustela erminea</i>         | Stoat                       | MELV        | 14    |
| <i>Mustela putorius</i>        | Ferret                      | MELV        | 18    |
| <i>Neovison vison</i>          | Mink                        | MELV        | 12    |
| <i>Galeopterus variegatus</i>  | Sunda colugo                | DELV        | 6     |
| <i>Pedetes capensis</i>        | South African springhare    | SpELV       | 14    |

**Footnote.** Abbreviations: RELIK=Rabbit endogenous lentivirus K; PSIV=Prosimian immunodeficiency virus ; MELV=Mustelid endogenous lentivirus; DELV=Dermopteran endogenous lentivirus; SpELV=springhare endogenous lentivirus.

**Table 3. Springhare endogenous lentivirus loci**

| ERV locus <sup>a</sup> | Structure   | Age (Mya) <sup>b</sup> | Contig         | Orientation | Start  | End    |
|------------------------|-------------|------------------------|----------------|-------------|--------|--------|
| SpELV.1-PedCap         | LTR-Gag-Pol | 8,750,000              | VMDO01011022.1 | +           | 63971  | 68252  |
| SpELV.2-PedCap         | LTR-Gag     | 12,500,000             | VMDO01050306.1 | +           | 2112   | 3978   |
| SpELV.3-PedCap         | Gag         | ND                     | VMDO01082106.1 | -           | 284    | 997    |
| SpELV.4-PedCap         | Gag         | ND                     | VMDO01088624.1 | -           | 445    | 1155   |
| SpELV.6-PedCap         | LTR         | 10,084,925             | VMDO01001729.1 | -           | 65134  | 65652  |
| SpELV.14-PedCap        | LTR         | 11,194,029             | VMDO01006229.1 | +           | 41369  | 41857  |
| SpELV.15-PedCap        | LTR         | 11,460,554             | VMDO01001857.1 | +           | 174371 | 174854 |
| SpELV.16-PedCap        | LTR         | 11,460,554             | VMDO01001488.1 | +           | 108014 | 108496 |
| SpELV.17-PedCap        | LTR         | 8,528,784              | VMDO01000902.1 | +           | 172296 | 172776 |
| SpELV.18-PedCap        | LTR         | 11,143,410             | VMDO01003412.1 | +           | 3534   | 4013   |
| SpELV.21-PedCap        | LTR         | 9,594,882              | VMDO01035581.1 | -           | 11304  | 11783  |
| SpELV.24-PedCap        | LTR         | 11,388,286             | VMDO01046849.1 | +           | 1434   | 1906   |
| SpELV.25-PedCap        | LTR         | 13,592,750             | VMDO01015080.1 | +           | 21755  | 22226  |
| SpELV.28-PedCap        | LTR         | 17,665,952             | VMDO01001033.1 | -           | 148080 | 148542 |

**Footnote:** <sup>a</sup> Loci were assigned unique identifiers (IDs) following a standard nomenclature system [45].

PedCap=*Pedetes capensis*. The ages of LTR-encoding elements was estimated by measuring divergence from an LTR consensus sequence and applying a neutral rate calibration, as described by Subramanian *et al.* [33].

ND=not done. SpELV=Springhare endogenous lentivirus.

## FIGURE LEGENDS

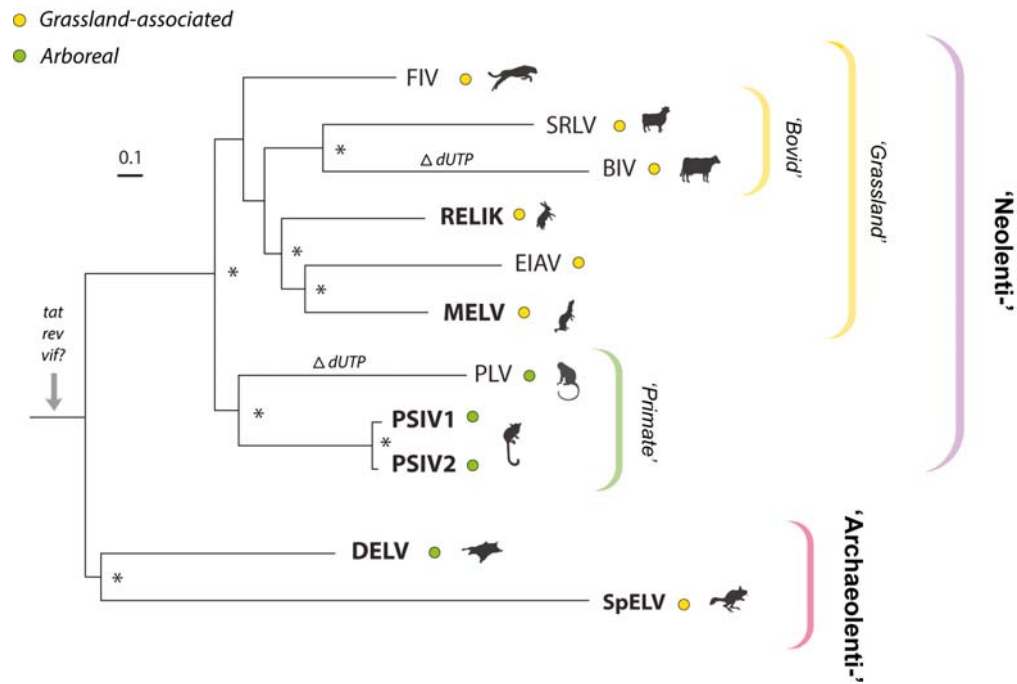

# Figure 1. Phylogenetic relationships within the Lentivirus genus.

Maximum likelihood phylogeny showing reconstructed evolutionary relationships between all known lentivirus species, including the extinct species represented by endogenous lentiviruses. Brackets to the left indicate proposed subgroupings within genus *Lentivirus*. Coloured circles adjacent virus taxa labels indicate the ecological characteristics of the associated host species (grassland-dwelling or arboreal) as shown in the key top right. The phylogeny is midpoint rooted for display purposes and was reconstructed using a multiple sequence alignment spanning 1405 amino acid residues of the Gag-Pol polyprotein and the RT-Rev substitution model [46]. The scale bar shows evolutionary distance in substitutions per site. Asterisks indicate nodes with bootstrap support >70% (1000 replicates). **Abbreviations:** DELV=Dermopteran endogenous lentivirus; SpELV=springhare endogenous lentivirus. RELIK=Rabbit endogenous lentivirus type K; Mustelidae endogenous lentivirus (MELV); BIV=Bovine immunodeficiency virus; SIV=Simian immunodeficiency virus; EIAV=equine infectious anaemia virus; FIV=Feline immunodeficiency virus; Human immunodeficiency virus=HIV; SRLV=small ruminant lentivirus; PSIV=Prosimian immunodeficiency virus.

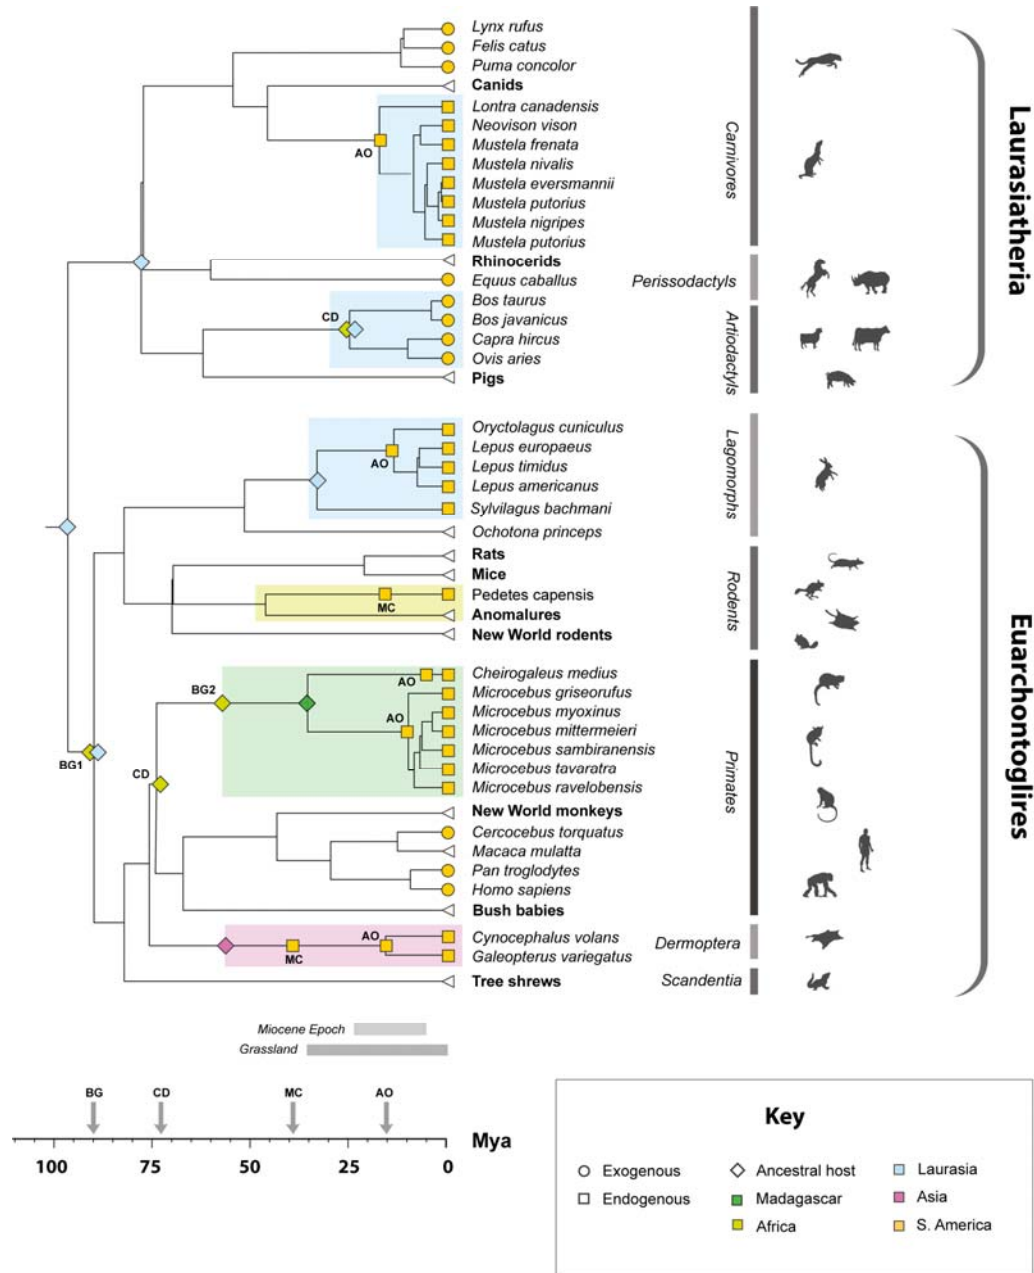

**Figure 2. An updated timeline of lentivirus evolution.** A time-calibrated phylogeny of mammalian species showing the known extent of association between lentiviruses and mammals, based on data obtained from TimeTree [47]. The scale bar shows time in millions of years before present. Brackets and bars to the right of taxa labels indicate host taxonomic groups. Coloured squares on terminal nodes indicate that host species associated with endogenous lentiviruses (squares) or exogenous lentiviruses (circles). The timeframe of endogenous lentivirus presence in each mammalian lineage is indicated by shaded boxes underneath clades, with colours indicating biogeographic associations of hosts within each clade following the key. White triangles at tree tips indicate host species or groups that have not yet been associated with any lentiviruses (endogenous or exogenous). Two-letter codes adjacent internal markers indicate the type of calibration being shown, as follows (AO=identification of an ancient ortholog; MC=application of a molecular clock to neutrally diverging sequences; CD=assumption of codivergence with hosts; BG=assumption of presence in biogeographic area inhabited by ancestor of species groups that are now biogeographically separated – note that this assumes no transfer between the respective regions identified by derived host species). Colours on diamond-shaped node markers indicate the known biogeographic range of ancestral hosts, as indicated in the key. The biogeographic range of the springhare-colugo ancestor (BG1) is uncertain (hence two regions are shown). The colonisation of isolated Madagascar by lemurs (BG2) is thought to have occurred ~60 million years ago (Mya) [40, 41].

## SUPPLEMENTARY FIGURE LEGENDS

### Figure S1. Phylogenetic and genomic characteristics of springhare endogenous lentivirus.

**(a)** Maximum likelihood (ML) phylogeny based on an alignment of reverse transcriptase (RT) protein sequences and showing the reconstructed evolutionary relationships between lentiviruses and other retroviruses. Asterisks indicate nodes with bootstrap support >70% (1000 replicates). The scale bar shows evolutionary distance in substitutions per site.

**(b)** ML phylogeny showing reconstructed evolutionary relationships between SpELV long terminal repeat (LTR) sequences. Numbers next to nodes indicate bootstrap support values (1000 replicates). The scale bar shows evolutionary distance in substitutions per site.

**(c)** Consensus genome structures of ancient lentiviral paleoviruses. **Abbreviations:** DELV=Dermopteran endogenous lentivirus; RELIK=Rabbit endogenous lentivirus type K; Mustelidae endogenous lentivirus (MELV); BIV=Bovine immunodeficiency virus; SIV=Simian immunodeficiency virus; FIV=Feline immunodeficiency virus; Human immunodeficiency virus=HIV; Prosimian immunodeficiency virus=PSIV; RV=Retrovirus; LV=Leukemia virus.

### Figure S2. The SpELV consensus sequence.

Inverted repeats present at the ends of the 5' long terminal repeat (LTR) sequence are highlighted in light grey. Regions of nucleic acid secondary structure, the transactivation responsive (TAR) element and primer binding site (PBS) are highlighted in dark grey. The locations of the proteins encoded by the *gag* and *pol* genes were determined by homology to the DELV consensus sequence [24-26].

### Figure S3. The putative SpELV TAR (transactivation responsive region) element

Secondary structures were predicted using the MFOLD thermodynamic folding algorithm [48] and assessed by comparison to well-characterised examples in other lentiviruses.



#### **Figure S4. Nucleotide compositional bias in lentivirus genomes.**

Nucleotide composition of whole genomes of Lentiviruses were normalised to length and plotted as percentages using R in R Studio (version 4.2.1). Reference genome sequences for each virus correspond to those given in **Table 1**. Bovine immunodeficiency virus (BIV), Dermopteran endogenous lentivirus (DELV), Equine infectious anaemia virus American strain (EIAV\_Am), Feline immunodeficiency virus (FIV), Human immunodeficiency virus 1 (HIV\_1M), Mustelidae endogenous lentivirus (MELV), Prosimian immunodeficiency virus 2 (PSIV); Rabbit endogenous lentivirus type K (RELK), Springhare endogenous lentivirus (SpELV), Small ruminant lentivirus A (SRLV\_A); Adenine (A), Guanine (G), Cytosine (C), Thymine (T).

## **DECLARATIONS**

### **Ethics approval and consent to participate**

Not applicable

### **Consent for publication**

Not applicable

### **Availability of data and materials**

All data are openly available in the Lentivirus-GLUE project hosted on GitHub:

<https://giffordlabcvr.github.io/Lentivirus-GLUE/>

### **Competing interests**

None declared.

### **Funding**

RJG is funded by the Medical Research Council of the United Kingdom (MC\_UU\_12014/12).

NIH funding. The funding bodies had no role in the design of the study and collection, analysis, and interpretation of data, or in writing the manuscript.

### **Acknowledgments**

We thank Daniel Blanco-Melo, Anne Emory, Ron Swanstrom and Greg Towers for helpful discussions.

### **Authors' contributions**

Conceptualization, R.J.G.; methodology and validation, A.G., R.K., and R.J.G.; formal analysis, A.G., R.J.G.; writing—original draft preparation, R.J.G.; writing—review and editing, A.G., R.J.G., and R.K.; visualization, A.G., R.J.G.; supervision, R.J.G.; project administration, R.J.G.; data curation, R.J.G. All authors have read and agreed to the published version of the manuscript.

## REFERENCES

1. Narayan, O. and J.E. Clements, *Biology and pathogenesis of lentiviruses*. J Gen Virol, 1989. **70 ( Pt 7)**: p. 1617-39.
2. van der Kuyl, A.C. and B. Berkhout, *The biased nucleotide composition of the HIV genome: a constant factor in a highly variable virus*. Retrovirology, 2012. **9**: p. 92.
3. van Hemert, F., A.C. van der Kuyl, and B. Berkhout, *On the nucleotide composition and structure of retroviral RNA genomes*. Virus Res, 2014. **193**: p. 16-23.
4. Yamashita, M. and M. Emerman, *Retroviral infection of non-dividing cells: old and new perspectives*. Virology, 2006. **344**(1): p. 88-93.
5. Brown, P.O., *Integration*, in *Retroviruses*, J.M. Coffin, S.M. Hughes, and H.E. Varmus, Editors. 1997, Cold Spring Harbor Laboratory Press: Cold Spring Harbor.
6. Gifford, R. and M. Tristem, *The evolution, distribution and diversity of endogenous retroviruses*. Virus Genes, 2003. **26**(3): p. 291-315.
7. Hayward, A., C.K. Cornwallis, and P. Jern, *Pan-vertebrate comparative genomics unmasks retrovirus macroevolution*. Proc Natl Acad Sci U S A, 2015. **112**(2): p. 464-9.
8. Johnson, W.E., *Origins and evolutionary consequences of ancient endogenous retroviruses*. Nat Rev Microbiol, 2019. **17**(6): p. 355-370.
9. Stoye, J.P., *Studies of endogenous retroviruses reveal a continuing evolutionary saga*. Nat Rev Microbiol, 2012. **10**(6): p. 395-406.
10. Belshaw, R., et al., *Rate of recombinational deletion among human endogenous retroviruses*. J Virol, 2007. **81**(17): p. 9437-42.
11. Gifford, R.J., *Viral evolution in deep time: lentiviruses and mammals*. Trends Genet, 2012. **28**(2): p. 89-100.
12. Keckesova, Z., et al., *Identification of a RELIK orthologue in the European hare (Lepus europaeus) reveals a minimum age of 12 million years for the lagomorph lentiviruses*. Virology, 2009. **384**(1): p. 7-11.
13. Halo, J.V., et al., *Origin and recent expansion of an endogenous gammaretroviral lineage in domestic and wild canids*. Retrovirology, 2019. **16**(1): p. 6.
14. Diehl, W.E., et al., *Tracking interspecies transmission and long-term evolution of an ancient retrovirus using the genomes of modern mammals*. Elife, 2016. **5**: p. e12704.
15. Compton, A.A., H.S. Malik, and M. Emerman, *Host gene evolution traces the evolutionary history of ancient primate lentiviruses*. Philos Trans R Soc Lond B Biol Sci, 2013. **368**(1626): p. 20120496.
16. Dewannieux, M., et al., *Identification of an infectious progenitor for the multiple-copy HERV-K human endogenous retroelements*. Genome Res, 2006. **16**(12): p. 1548-56.
17. Blanco-Melo, D., R.J. Gifford, and P.D. Bieniasz, *Co-option of an endogenous retrovirus envelope for host defense in hominid ancestors*. Elife, 2017. **6**.
18. Goldstone, D.C., et al., *Structural and functional analysis of prehistoric lentiviruses uncovers an ancient molecular interface*. Cell Host Microbe, 2010. **8**(3): p. 248-59.
19. Katzourakis, A., et al., *Discovery and analysis of the first endogenous lentivirus*. Proc Natl Acad Sci U S A, 2007. **104**(15): p. 6261-5.
20. Gifford, R.J., et al., *A transitional endogenous lentivirus from the genome of a basal primate and implications for lentivirus evolution*. Proc Natl Acad Sci U S A, 2008. **105**(51): p. 20362-7.
21. Gilbert, C., et al., *Parallel germline infiltration of a lentivirus in two Malagasy lemurs*. PLoS Genet, 2009. **5**(3): p. e1000425.
22. Han, G.Z. and M. Worobey, *Endogenous lentiviral elements in the weasel family (Mustelidae)*. Mol Biol Evol, 2012. **29**(10): p. 2905-8.
23. Cui, J. and E.C. Holmes, *Endogenous lentiviruses in the ferret genome*. J Virol, 2012. **86**(6): p. 3383-5.
24. Hron, T., et al., *Endogenous lentivirus in Malayan colugo (Galeopterus variegatus), a close relative of primates*. Retrovirology, 2014. **11**(1): p. 84.

25. Han, G.Z. and M. Worobey, *A primitive endogenous lentivirus in a colugo: insights into the early evolution of lentiviruses*. Mol Biol Evol, 2015. **32**(1): p. 211-5.
26. Hron, T., et al., *Life History of the Oldest Lentivirus: Characterization of ELVgv Integrations in the Dermopteran Genome*. Mol Biol Evol, 2016. **33**(10): p. 2659-69.
27. Zhu, H., et al., *Database-integrated genome screening (DIGS): exploring genomes heuristically using sequence similarity search tools and a relational database*. bioRxiv, 2018.
28. Altschul, S.F., et al., *Gapped BLAST and PSI-BLAST: a new generation of protein database search programs*. Nuc. Acids Res., 1997. **25**: p. 3389-3402.
29. Kitts, P.A., et al., *Assembly: a resource for assembled genomes at NCBI*. Nucleic Acids Res, 2016. **44**(D1): p. D73-80.
30. Dewannieux, M. and T. Heidmann, *Endogenous retroviruses: acquisition, amplification and taming of genome invaders*. Curr Opin Virol, 2013. **3**(6): p. 646-56.
31. Gifford, R., et al., *Evolution and distribution of class II-related endogenous retroviruses*. J Virol, 2005. **79**(10): p. 6478-86.
32. Stamatakis, A., *RAxML version 8: a tool for phylogenetic analysis and post-analysis of large phylogenies*. Bioinformatics, 2014. **30**(9): p. 1312-3.
33. Subramanian, R.P., et al., *Identification, characterization, and comparative genomic distribution of the HERV-K (HML-2) group of human endogenous retroviruses*. Retrovirology, 2011. **8**: p. 90.
34. Rambaut, A., *Se-Al: sequence alignment editor*. 1997: Edinburgh.
35. Gifford, R.J. *Lentivirus-GLUE*. 2021; Available from: <https://giffordlabcvr.github.io/Lentivirus-GLUE>.
36. Sharp, P.M. and B.H. Hahn, *The evolution of HIV-1 and the origin of AIDS*. Philos Trans R Soc Lond B Biol Sci, 2010. **365**(1552): p. 2487-94.
37. Kosugi, Y., et al., *Comprehensive Investigation on the Interplay between Feline APOBEC3Z3 Proteins and Feline Immunodeficiency Virus Vif Proteins*. J Virol, 2021. **95**(13): p. e0017821.
38. Alberty, G.F., et al., *The science of the host-virus network*. Nat Microbiol, 2021. **6**(12): p. 1483-1492.
39. Springer, M.S., et al., *The historical biogeography of Mammalia*. Philos Trans R Soc Lond B Biol Sci, 2011. **366**(1577): p. 2478-502.
40. Karanth, K.P., et al., *Ancient DNA from giant extinct lemurs confirms single origin of Malagasy primates*. Proc Natl Acad Sci U S A, 2005. **102**(14): p. 5090-5.
41. Poux, C., et al., *Asynchronous colonization of Madagascar by the four endemic clades of primates, tenrecs, carnivores, and rodents as inferred from nuclear genes*. Syst Biol, 2005. **54**(5): p. 719-30.
42. Ge, D., et al., *Evolutionary history of lagomorphs in response to global environmental change*. PLoS One, 2013. **8**(4): p. e59668.
43. Toljagić, O., et al., *Millions of Years Behind: Slow Adaptation of Ruminants to Grasslands*. Systematic Biology, 2017. **67**(1): p. 145-157.
44. Law, C.J., *Evolutionary shifts in extant mustelid (Mustelidae: Carnivora) cranial shape, body size and body shape coincide with the Mid-Miocene Climate Transition*. Biol Lett, 2019. **15**(5): p. 20190155.
45. Gifford, R.J., et al., *Nomenclature for endogenous retrovirus (ERV) loci*. Retrovirology, 2018. **15**(1): p. 59.
46. Dimmic, M.W., et al., *rtREV: an amino acid substitution matrix for inference of retrovirus and reverse transcriptase phylogeny*. J Mol Evol, 2002. **55**(1): p. 65-73.
47. Kumar, S., et al., *TimeTree: A Resource for Timelines, Timetrees, and Divergence Times*. Mol Biol Evol, 2017. **34**(7): p. 1812-1819.
48. Zuker, M., *Mfold web server for nucleic acid folding and hybridization prediction*. Nucleic Acids Research, 2003. **31**(13): p. 3406-3415.

a)

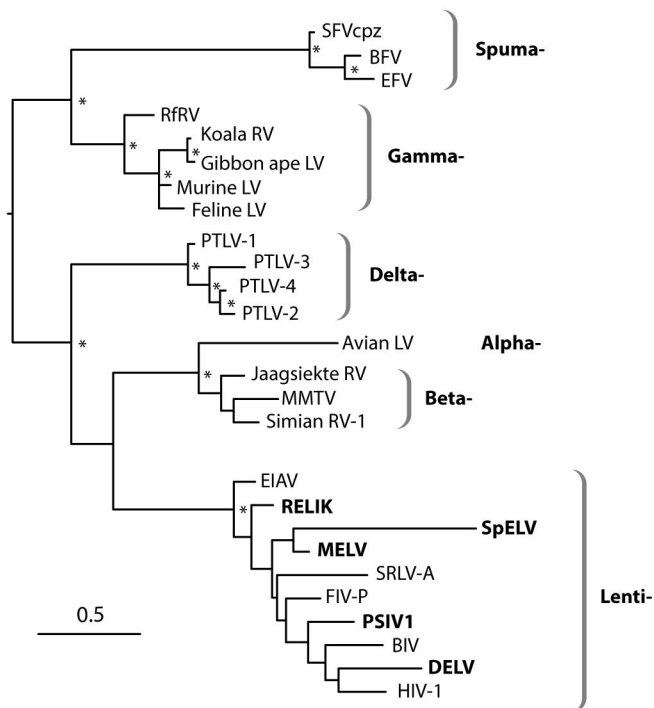

c)

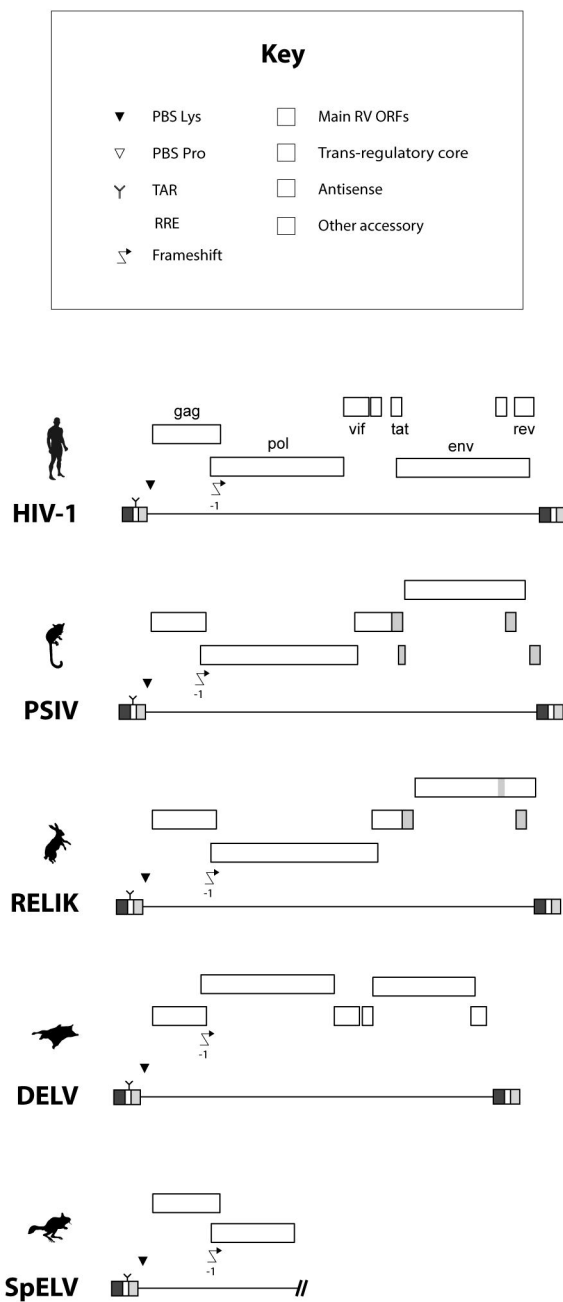

b)

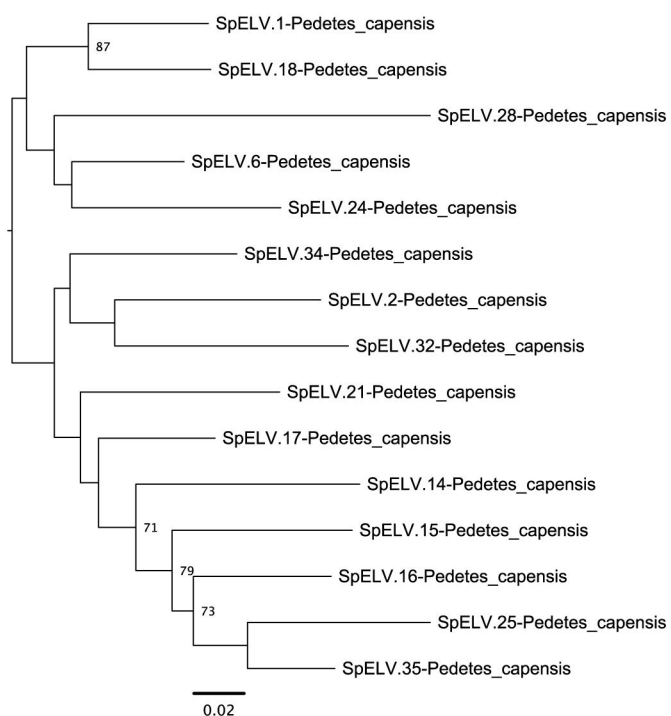

I.R.

1 TGTTAGCCCTTGGGGAACCTTTTGTACACAGGACCTGCAACATCTGAAGAATTGAGAAGATTGCTAAATCAATCTGATGGA 80

81 CTGCGGACAGCCGGGGTGGAGTCACTTGGGGAGAAATGGGTATATCCTGCAGAAGAAGTAAGCTAAACTGGAGATTG 160

Transactivation response (TAR) element

161 AGATTTGCAGAAGTGGCAAGCCAGCCTGATAGATAGTGTCTGAATAAGTGCATTGGTGATGGGTCCTTGAGTGATGGATT 240

241 TTACCTCGTTTGAGCGTTTGTACACAAATACTCTGTCTAGCAAAATGCCATGCTTGATTGACATATCCGTTTGTTTTTTTT 320

321 GTCTATATATACTTTGAGGACTGCTTCATGGGGAGAGACCTTAGGTCTATCCTCGTGACCCAATAAAGCATTGCAGAACT 400

I.R.

401 AGACACTGGTCTCCCGAGAATTTTGTCTAGGTTCTGGGCAGTAAGCTTCCTCCTCGGCGGGTCTCTTCA 480

Primer binding site

481 CACTGGGGGCACGGGAGTTACAGGTGGCGCCAGTGTGGGGTCCATAGGGCTTGAGAAGGGGCTCAGGAAGGGGAGTC 560

561 CACACTCTTGCTAGATGTCTCAGAAAGCTGTCTGAGAGGCCAATAGACAGCTCCCCAAAGCTGAGAGAACTAAAAGC 640

M S N

641 GAAACTAACAGGTGCAGCCAGCACAGGCAGCCAATGGACGCATCACTGGAAAGAGGAAGCAGTGAGTGAAAATGAGCAA 720

G S S L G K D L R E L E E K F S K E L T P K V K G N L

721 TGGATCCAGCTTGGGGAAGATCTGAGAGAGCTTGGAGAAAATTTAGTAAGGAGCTCACACCTAAAGTGAAAGGGAATT 800

K I L T K V A Q V E G G I Y D P G Y L G Y V F T A I

801 TAAAGATCTTAAGTGAAGTCAAGTGAAGGTGGCATCTATGACCCAGGGTATTTAGGATATGTCTTCACAGCCATT 880

E D F L L Q T E A A C Q G I L L S G H L L E K G M I I

881 GAGGATTTTGTGTCAGACTGAAGCCGCATGCCAGGGCATACTTTTGTCTGACATTGCTGGAAAAGGGATGATTAT 960

K L V T F L L E Q E K E K L A R A W M V F Y A V V I Q

961 TAAACTAGTAACCTTCTTGCTAGAACAGGAGAAGGAAAAGCTAGCAAGAGCATGGATGGTGTCTTTATGCAGTAGTGATTC 1040

G I P L R Q R G L L V K H G M M W R R P R A R S V R

1041 AAGGAATTCGTTAAGACAGAGAGGGGTGCTTGTCAAGCATGGAATGATGTGGCGGAGGCCAAGGGCCCGGTCTGTCAAG 1120

S E V Q G Q E E A S V N P V T R V P Q G G P V P I K F

1121 TCTGAAGTACAAGGACAAGAGGAGGCATCAGTAAACCTGTAACTAGAGTACCACAGGGAGGTCCAGTGCCTATAAAATT 1200

P L K E L T R I A S V T V E H G S L S D P V Q H H L L

1201 TCCATTGAAGGAGTTGACAGCAATAGCTTCTGTAAAGTGAACATGGTTCCCTCTCAGATCCAGTTCAACACCATTAT 1280

Matrix ← Capsid

1281 TAACTGTCTCAACTGCTGATCTGACTCCAGGAGACTGGATGACTGTGTTTTCAGCAATGCAAGGAAATGGGGCAATAAAG 1360

T G I Q G L I A Q K M E E D E E A N G P G S S Q P I I

1361 ACAGGAATACAAGGGTTAATAGCTCAAAAAATGGAAGAGGATGAGGAAGCAAAATGGACCAGGGTCATCACAGCTATTAT 1440

G T N M T A A Q Q A S D Q Q A P H Y K L F M Q W I L D

1441 AGGGACAAATATGACAGCTGCCAGCAGGCTAGTGATCAGCAGGCACCTCACTACAACTATTTATGCAGTGAGTCTTAG 1520

T C Q Q L R E K V G G A L I P P T R I L Q E P K E P

1521 ATACATGTCAGCAACTGAGAGAAAAAGTGGGAGGTGCTCTGATACCCCTACCAGGATTTTGCAAGAGCCAAAGGAGCCC 1600

Y G D F T D Q L H V A I E K L T M S Q E L K E E L K D

1601 TATGGCGACTTCACAGATCAACTCCATGTGGCCATAGAAAAGTTAACAATGAGTCAAGAGTTGAAGGAAGAATTAAAGGA 1680

R L S V D N T N G D C K R A L G K I E Y G D P L V D

1681 CAGGTTATCAGTAGATAACACCAATGGTGATTGCAAGAGAGCATTAGGAAAAATTGAGTATGGAGATCCACTAGTGGACA 1760

K L K S C Q N V G T L T W K K A L M A E T E A P K N N

1761 AACTAAAATCATGTCAGAAATGAGGAACACTGACATGGAAGGAGGCACTTATGGCGGAAACCGAAGCACCTAAGAACAAT 1840

Capsid ← Nucleocapsid

1841 Q R V I Q P T S R K I I C F K C G T A G H I K R N C R 1920

CAGAGGGTAATACAACCTACCAGCAGGAAGATTATTTGTTTTAAATGTGGTACAGCTGGACACATAAAAGGAAGTGTAG

K G S Q D R R E P N L C L I C K K E K R W T S Q C P

1921 GAAAGGATCACAGGACAGGAGAGCCAAATCTGTCTGATTGCAAGAAAGAGAAGCGCTGGACATCTCAATGTCCAC 2000

Q E K N \* H G G T Q K G T Q F P S M D S K I V P \* P T

2001 AGGAAAAAACTAGCATGGGGGACTCAGAAGGGCACTAGTTCCTAGCATGGACAGTAAAATTGTGCCCTGACCAACC 2080

E I E K I R T L K Y R P C L L I Q T P L E E  
 \* V F I G N R K D K N S Q V  
 2081 TAAGTCTTTATAGGAAATAGAAAAGATAAGAACTCTCAAGTATAGACCATGTTTATTAATACAACTCCTTTGGAAGAAA 2160  
 Protease active site  
 I N S L M D T G A D L R I L G E Q I K V D H Y P M G A  
 2161 TTAATTCCTGATGGACACAGGAGCAGACCTAAGAATCTTAGGAGAACAGATAAAAAGTAGATCATTACCCAATGGGAGCT 2240  
 S I K V T G I G D S Q K F Q F Y L Y G V D I R G R F G  
 2241 TCCATAAAAGTAACTGGAATAGGAGACTCCCAGAAATTCCAATTCTATCTATATGGTGTAGATATTAGAGGAAGGTTTGG 2320  
 N R M A H M P G T M D L L G \* D A L E I L G I R L V  
 2321 GAATAGGATGGCACATATGCCAGGAACCTATGGATTTATTAGGGTGAGATGCTCTAGAAATACTAGGCATAAGGTTAGTAG 2400  
 G A V L S T K L Q P V M P A F K P N A K F P K L K Q W  
 2401 GAGCTGTACTGTCTACAAAATTACAGCCTGTCTATGCCAGCTTTTAAGCCAATGCCAAGTTTCCAAAACCTCAACAGTGG 2480  
 Pro ← RT  
 P I S A E K L K D I K S I T D S L L S E N K I R K A A  
 2481 CCGATTTTCAGCCGAGAAGCTAAAAGACATAAAGTCAATAACTGACTCCTTGCTTTCTGAAAATAAGATTAGAAAAGCGGC 2560  
 P G N P W N T P C F V I K K R D G K T F R L S M D F  
 2561 CCCAGGAAATCCATGGAACACTCCATGTTTTGTTATTAAGAAAAGGGATGGAAGAACTTTTAGATTATCAATGGACTTTA 2640  
 K Q L N E C T E Y V V A T N P G L P H P S G I L R M H  
 2641 AACAACTAAATGAATGTACTGAATATGTGGTGGCAACCAACCCAGGCTTACCTCATCCATCAGGCATCCTTAGAATGCAC 2720  
 K F H V L L D M A N A Y F T V P I A E E F R P Y T A F  
 2721 AAATTTTCATGTCTTATTAGATATGGCCAATGCCTACTTTACTGTACCCATTGCTGAGGAGTTTCAGGCCCTACACTGCATT 2800  
 T V P Q I N M V G L G D R Y E W C C L P K G W N G S P  
 2801 TACAGTACCTCAGATCAACATGGTAGGACTGGGAGATAGATATGAATGGTGTGTTTACCAAAGGCTGGAATGGGAGCC 2880  
 E T F Q S T L R P I I A V I E R R K S K A V S I I T  
 2881 CAGAACTTTTCAATCTACTCTAAGACCTATTATAGCAGTTATAGAAAGAAGGAAGTCTAAAGCAGTCTCCATAATTACT 2960  
 RT active site  
 Y M D D I L I S G E T E A Q V E R I K L L T E E F Q K  
 2961 TATATGGATGACATCTTAATCTCAGGAGAAACAGAGGCCCAAGTGAGAGAATAAACTACTCACAGAAGAATTTAGAA 3040  
 W G F E L P P D K Q Q R G K N I E R V L G Y C L T D  
 3041 GTGGGGTTTTGAGTTGCCTCCAGATAAGCAACAGAGAGGAAAGAATATAGAGAGAGTCTTAGGTTATTGCCTTACTGATG 3120  
 E G W K P T N M E L R K E E I Q T L H D V Q V V R E T  
 3121 AGGGATGGAACCCACAAACATGGAACCTAAGGAAGGAGGAAATACAGACTTTTACATGATGTACAAGTTGTTAGGGAACT 3200  
 T M V R D W V P I D L T P I H Y L L R G D Q D L L S P  
 3201 ACAATGGTTAGGACTGGGTACCTATAGATCTTACTCCATACATTACTTGCTGCGAGGAGATCAAGACCTTCTCAGTCC 3280  
 Q K A T P E V N R L L Q E V D Q K I K S E L E R G R  
 3281 ACAAAAAGCCACCCCTGAAGTGAATAGGCTATTACAGGAAGTAGATCAAAAAATAAGTCAGAATTGGAGAGAGGAAGGA 3360  
 D P Q K D L E G S W D T L G V T I H Q G K V I L S W  
 3361 TAGATCCACAAAAGGACTTAGAGGGATCTTGGGATACTCTAGGAGTTACCATCCATCAGGGGAAGGTGATTCTTAGTTGG 3440  
 A P F T F P N G T V D L L S L L D S S V D K V Q M F E  
 3441 GCACCATTACGTTCCCAATGGAACAGTGGATTTGCTCTCATTACTAGACAGTTCAGTGGACAAGGTTAGATGTTTGA 3520

L L R Y G Y E S K I I N Q S G S \* K E L K S L Q M Q  
 3521 ATTATTAAGATATGGATATGAGTCCAAGATAATAAACAGTCAGGGTCCTAGAAAGAATTAAAAAGTTTACAAATGCAGG 3600  
 D V W P T R W T Y K K F I C K N G Q G W T I G L S N L  
 3601 ATGTGTGGCCTACAAGATGGACATATAAGAAGTTTATTTGTAAAAATGGTCAGGGTTGGACTATAGGATTATCCAATCTA 3680  
 L Q I R R I E K T P I V G G E T V Y T D A S R L R K T  
 3681 CTTCAGATTAGGAGGATTGAAAAACACCTATTGTAGGAGGAGAGACTGTCTATACAGATGCATCGAGGTTGCGGAAAAC 3760  
 N H K R I A W Y N T T T G D T H S M E V S T E T G H  
 3761 TAACCACAAGAGAATAGCTTGGTACAACACAACCGGGAGACACACATAGTATGGAAGTAAGCACAGAAACAGGACATG 3840  
 A \* Q A E L L A I I G V L I N H P R S L N I V T H S K  
 3841 CATGACAAGCAGAGCTCTTAGCAATTATAGGAGTACTAATTAATCATCCTAGGTCCTAAATATAGTAACACATAGCAAA 3920  
 Y I A A F L P K I G G H E R N N L W Q E V I A M L A E  
 3921 TATATTGCAGCTTTTCTACCAAAAATAGGAGGACATGAGAGAAAATAACCTATGGCAAGAAGTAATAGCCATGCTGGCAGA 4000  
 R V K Q R Y R T F V S W V P G H S E V Q E M  
 4001 AAGGGTAAAGCAAAGATATAGAACATTTGTTTCTTGGGTTCTTGACACAGTGAGGTCCAGGAAATGA 4068





Nucleotide % in Lentiviruses whole genomes

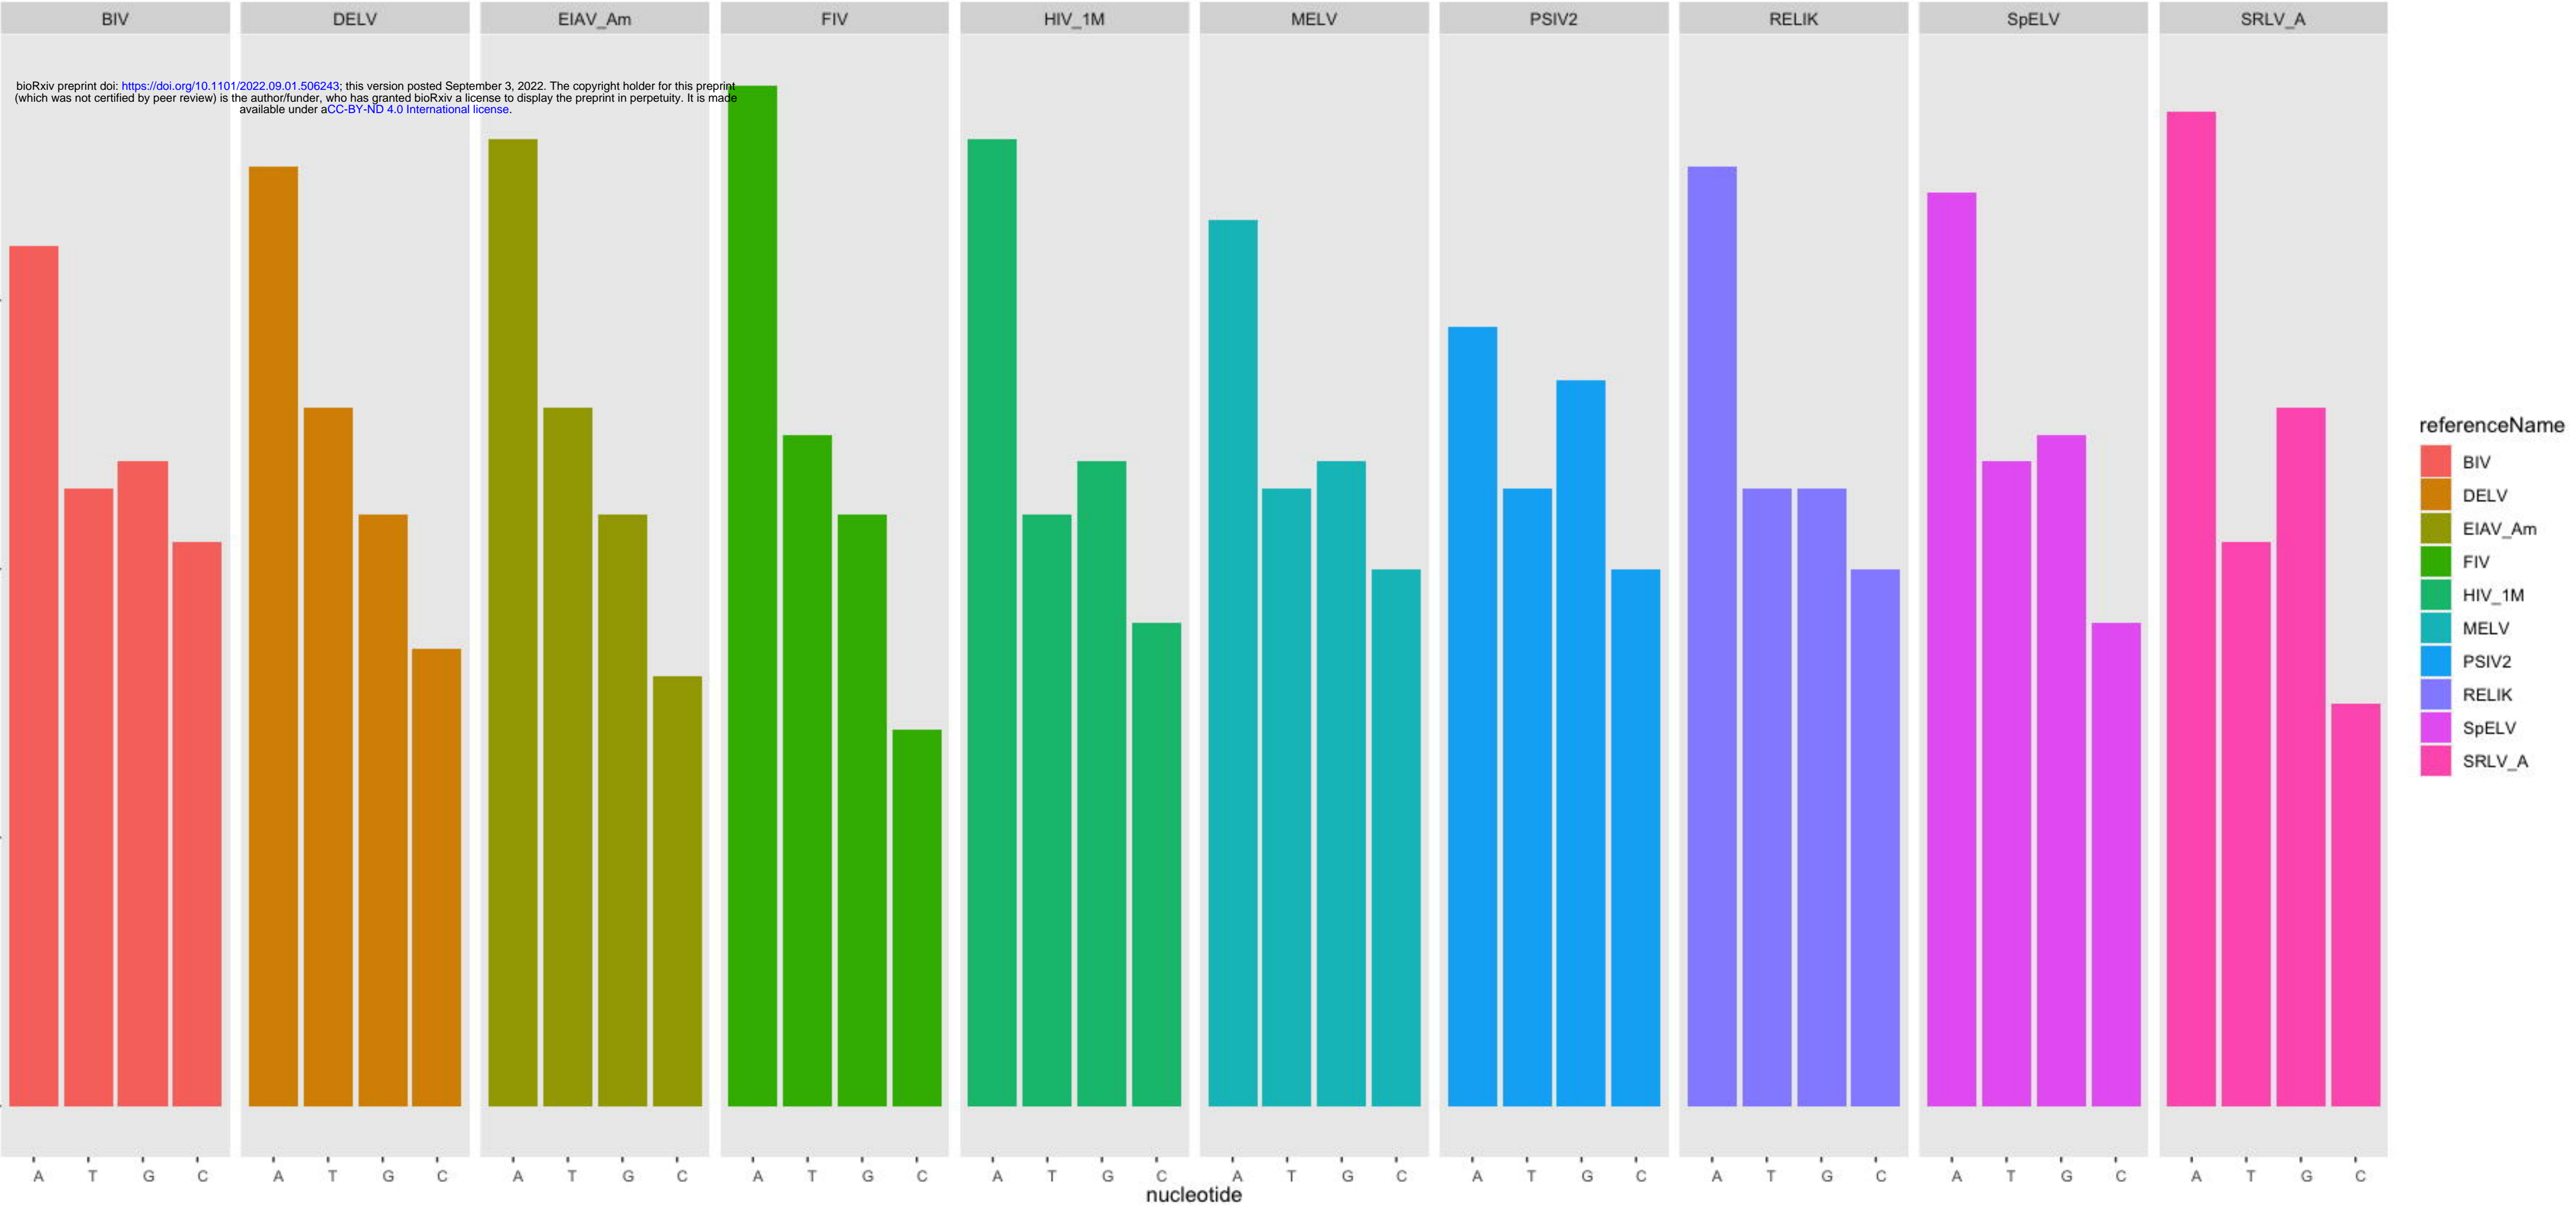

Source: https://www.biorxiv.org/content/10.1101/2022.09.01.506243v1.full.pdf
